# Supplementary material
Source: Elsevier journal article supplement (https://www.sciencedirect.com/science/article/pii/S0021755721000772)
Supplement: mmc1 [file S0021755721000772:mmc1.docx]

**JPED-D-20-00361 – Supplementary Material**

**Supplementary File 1 - Sample and dropouts flow chart.**

**Supplementary File 2 - Table Sociodemographic and behavioral characteristics of the participants for each phase of the study (2015, 2016, 2017).**

|  | **2015 (n :586)** | **2016 (n : 324)** | **2017 (n : 263)** |
| --- | --- | --- | --- |
|  | **n (%)** | **n (%)** | **n (%)** |
| **Gender** |  |  |  |
| Boys | 273 (46.6%) | 154(47.5%) | 119 (45.2%) |
| Girls | 313 (53.4%) | 170 (52.5%) | 144 (54.7%) |
| **Age** |  |  |  |
| <14 years old | 310 (52.9%) | 202 (62.5%) | 144 (54.7%) |
| >:14 years old | 276 (47.1%) | 122 (37.5%) | 119 (45.3%) |
| **Weight Status** |  |  |  |
| Normal weight | 348 (59,4%) | 191 (58,9%) | 156 (59.3%) |
| Overweight + Obesity | 238 (40,6%) | 133 (41,1%) | 107 (40,7%) |
| **Income Status** |  |  |  |
| Low (C1, C2, D and E) | 294 (50.2%) | 166 (51.2%) | 119 (45.2%) |
| High (A, B1 and B2) | 292 (49.8%) | 158 (48,8%) | 144 (54,7%) |
| **Parent educational level** | |  |  |
| Low | 305 (52,0%) | 172 (53.1%) | 142 (54.0%) |
| Medium | 164 (28.0%) | 95 (29.3%) | 75 (28,5%) |
| High | 117 (20.0%) | 57 (17.6%) | 46 (17.5%) |
| **PA participation** |  |  |  |
| Low | 171 (29.2%) | 112 (34.6%) | 93 (35.3%) |
| Moderate | 231 (39.4%) | 113 (34.9%) | 103 (39.1%) |
| High | 184 (31.4%) | 99 (30.5%) | 67 (25.4%) |

PA, physical activity.

**Supplementary File 3 - Time changes in sedentary activities between 2015 and 2017.**
